# Supplementary material
Source: Springer Nature journal article supplement (https://www.springermedizin.de/resource/supplementary/12943_2010_763_MOESM3_ESM.pdf/9554768)

**A**

MGH-U1

833K

SuSa

C 24 48 72 C 24 48 72 C 24 48 72 Time (h)

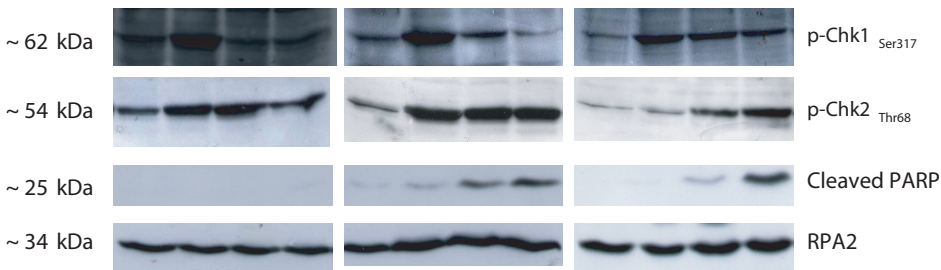**B**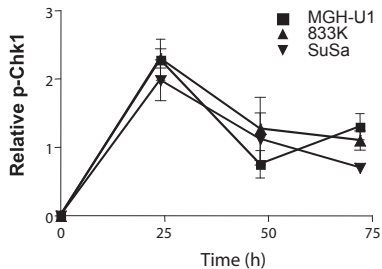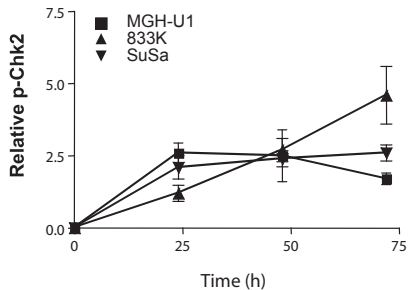

Supplement: MOESM3 [file 9554768]
